# Supplementary material
Source: Springer Nature journal article supplement (https://www.springermedizin.de/resource/supplementary/13046_2010_381_MOESM4_ESM.pdf/9661898)
Supplement: MOESM4 [file 9661898]

**A**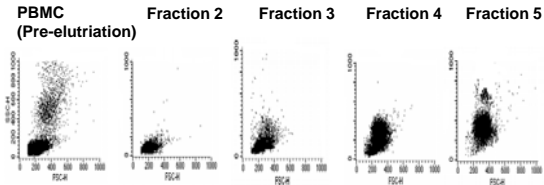**B**

Ave. Cell  
Number

$6.9 \times 10^9$

$5 \times 10^9$

$1.5 \times 10^8$

$5.1 \times 10^8$

$7 \times 10^8$

**Phenotype Distribution (%)**

|                                       |         |         |         |         |         |
|---------------------------------------|---------|---------|---------|---------|---------|
| CD3 <sup>+</sup>                      | 47+/-13 | 61+/-20 | 55+/-21 | 24+/-16 | 25+/-22 |
| CD4 <sup>+</sup>                      | 17+/-14 | 39+/-9  | 36+/-13 | 47+/-23 | 32+/-28 |
| CD8 <sup>+</sup>                      | 11+/-7  | 25+/-13 | 22+/-12 | 7+/-7   | 3+/-4   |
| CD3 <sup>+</sup><br>CD56 <sup>+</sup> | 6+/-7   | 5+/-6   | 15+/-11 | 4+/-7   | 3+/-6   |
| CD3 <sup>-</sup><br>CD56 <sup>+</sup> | 4+/-4   | 4+/-4   | 8+/-7   | 6+/-6   | 2+/-3   |
| CD14 <sup>+</sup>                     | 5+/-6   | 0+/-0.4 | 9+/-6   | 56+/-19 | 80+/-12 |
| CD19 <sup>+</sup>                     | 5+/-4   | 9+/-5   | 3+/-2   | 3+/-2   | 2+/-3   |
